# Supplementary material for: Occurrence of Fungicides in Vineyard and the Surrounding Environment
Source: MDPI journal article supplement (doi:10.3390/molecules26206152), 2021-10-12
Supplement: s1 [file s1]

**Figure S1.** Comparison of fungicide responses obtained in ACN, EtAc, Hexane:acetone (50:50, v/v) and MeOH, for standards solutions at 100 µg L<sup>-1</sup>

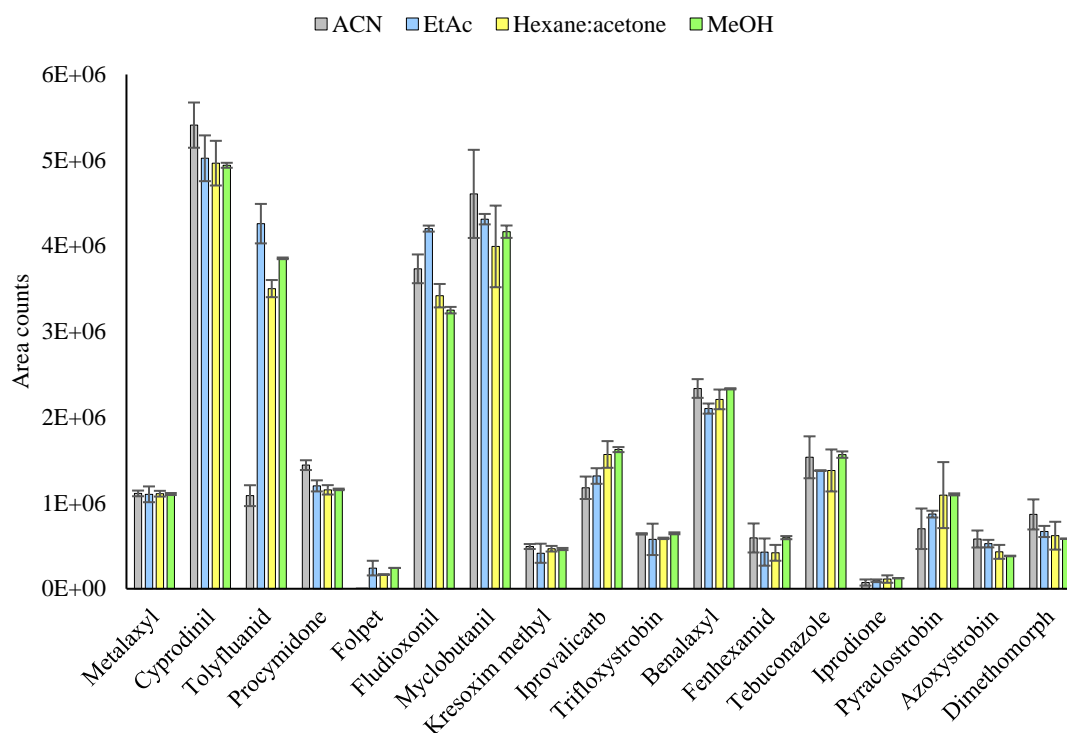

**Table S1.** MS/MS transitions of target fungicides. Underlined MS/MS transition is the selected for quantification.

| Fungicides      | MS/MS transitions<br>(Collision energy, eV) |
|-----------------|---------------------------------------------|
| Metalaxyl       | <u>206.1 → 132.0 (15)</u>                   |
|                 | 234.1 → 174.1 (10)                          |
| Cyprodinil      | <u>224.1 → 208.1 (20)</u>                   |
|                 | 225.1 → 210.1 (18)                          |
| Tolyfluanid     | <u>137.0 → 91.0 (20)</u>                    |
|                 | 238.0 → 136.0 (15)                          |
|                 | 238.0 → 137.0 (10)                          |
| Procymidone     | <u>283.0 → 96.0 (15)</u>                    |
|                 | 283.0 → 255.0 (10)                          |
| Folpet          | 146.9 → 102.9 (10)                          |
|                 | <u>259.9 → 94.9 (20)</u>                    |
|                 | 259.9 → 129.9 (16)                          |
| Fludioxonil     | <u>248.0 → 127.0 (30)</u>                   |
|                 | 248.0 → 154 (20)                            |
| Myclobutanil    | <u>179.0 → 125.05 (15)</u>                  |
|                 | 179.0 → 152.0 (15)                          |
| Kresoxim methyl | <u>206.1 → 116.0 (15)</u>                   |

|                 |                                                                       |
|-----------------|-----------------------------------------------------------------------|
|                 | 206.1 → 131.0 (15)                                                    |
| Iprovalicarb    | <u>116.1 → 55.1 (10)</u><br>116.1 → 98.0 (10)                         |
| Trifloxystrobin | <u>222.1 → 162.1 (10)</u><br>222.1 → 190.1 (4)                        |
| Benalaxyl       | 234.1 → 174.1 (10)<br><u>266.1 → 148.1 (10)</u>                       |
| Fenhexamid      | <u>177.0 → 113.0 (10)</u><br>178.9 → 113.1 (10)<br>301.1 → 97.0 (15)  |
| Tebuconazole    | <u>250.1 → 125.1 (20)</u><br>252.1 → 127.1 (20)                       |
| Iprodione       | 187.0 → 124.0 (20)<br>187.0 → 159.0 (40)<br><u>314.0 → 245.0 (15)</u> |
| Pyraclostrobin  | <u>132.0 → 77.0 (20)</u><br>164.0 → 132.0 (15)                        |
| Azoxystrobin    | <u>344.1 → 156.0 (20)</u><br>344.1 → 172.0 (20)<br>388.1 → 345.1 (15) |
| Dimethomorph    | <u>301.1 → 165.0 (10)</u><br>387.1 → 301.1 (12)                       |

**Table S2.** ANOVA (values in bold denote statistical significance: p-value < 0.05) and multiple range LSD test for the four studied solvents (\* denote statistical significance).

| Fungicides      | F-ratio       | P-value       | ACN-EtAc | ACN-Hex:Acet. | ACN-MeOH | EtAc-Hex:Acet | EtAc-MeOH | Hex:Acet-MeOH |
|-----------------|---------------|---------------|----------|---------------|----------|---------------|-----------|---------------|
| Metalaxyl       | 2.87          | 0.1674        |          |               |          |               |           |               |
| Cyprodinil      | 1.99          | 0.2580        |          |               |          |               |           |               |
| Tolyfluanid     | 2.93          | 0.1630        | *        |               |          |               | *         |               |
| Procymidone     | 2.16          | 0.2352        |          |               |          |               |           |               |
| Folpet          | <b>125.81</b> | <b>0.0002</b> | *        | *             | *        | *             |           |               |
| Fludioxonil     | 1.71          | 0.3021        |          |               |          |               |           |               |
| Myclobutanil    | 1.17          | 0.4262        |          |               |          |               |           |               |
| Kresoxim methyl | 5.07          | 0.0754        |          |               |          |               | *         | *             |
| Iprovalicarb    | 1.76          | 0.2940        |          |               |          |               |           |               |
| Trifloxystrobin | 1.62          | 0.3184        |          |               |          |               |           |               |
| Benalaxyl       | 1.24          | 0.4064        |          |               |          |               |           |               |
| Fenhexamid      | 1.73          | 0.2987        |          |               |          |               |           |               |
| Tebuconazole    | 1.69          | 0.3052        |          |               |          |               |           |               |
| Iprodione       | 5.16          | 0.0735        |          |               |          |               |           | *             |
| Pyraclostrobin  | 4.67          | 0.0854        |          |               |          | *             | *         |               |
| Azoxystrobin    | 5.59          | 0.0649        |          | *             |          | *             | *         |               |
| Dimethomorph    | 0.41          | 0.7554        |          |               |          |               |           |               |

**Table S3.** Concentration  $\pm$  SD (ng g<sup>-1</sup>) of Metalaxyl in tea samples.

| Samples<br>(n=3) | Metalaxyl      |
|------------------|----------------|
| Tea 1            | 7.5 $\pm$ 0.4  |
| Tea 2            | 2.1 $\pm$ 0.1  |
| Tea 3            | 2.9 $\pm$ 0.3  |
| Tea 4            | 3.2 $\pm$ 0.11 |
| Tea 5            | 2.1 $\pm$ 0.3  |
| Tea 6            | 6.6 $\pm$ 0.3  |
| Tea 7            | 2.0 $\pm$ 0.3  |
| Tea 8            | 2.3 $\pm$ 0.2  |

**Table S4.** Concentrations  $\pm$  SD ( $\mu\text{g g}^{-1}$ ) of the fungicides in vine leaves extracted with UAE and VE.

| Samples<br>(n=3) | Metalaxyl         | Cyprodinil      | Folpet          | Fludioxonil   | Mycobutanil       | Iprovalicarb | Benalaxyl         | Fenhexamid        | Tebuconazole        | Iprodione       | Pyraclostrobin    | Azoxystrobin  | Dimethomorph      |
|------------------|-------------------|-----------------|-----------------|---------------|-------------------|--------------|-------------------|-------------------|---------------------|-----------------|-------------------|---------------|-------------------|
| L13 VE           | 6.7 $\pm$ 0.3     |                 | 3.0 $\pm$ 0.1   |               | 0.010 $\pm$ 0.002 |              |                   | 0.045 $\pm$ 0.008 | 0.0090 $\pm$ 0.0009 |                 | 0.037 $\pm$ 0.006 |               | 0.13 $\pm$ 0.01   |
| L13 UAE          | 7.4 $\pm$ 0.3     |                 | 3.3 $\pm$ 0.2   |               | 0.013 $\pm$ 0.004 |              |                   | 0.058 $\pm$ 0.006 | 0.013 $\pm$ 0.002   |                 | 0.035 $\pm$ 0.002 |               | 0.17 $\pm$ 0.01   |
| L14 VE           | 0.090 $\pm$ 0.004 |                 | 0.94 $\pm$ 0.10 |               |                   |              |                   |                   |                     |                 |                   |               |                   |
| L14 UAE          | 0.065 $\pm$ 0.004 |                 | 1.0 $\pm$ 0.2   |               |                   |              |                   |                   |                     |                 |                   |               |                   |
| L14 VE           |                   | 0.45 $\pm$ 0.13 | 17 $\pm$ 4      | 2.9 $\pm$ 0.8 |                   | 48 $\pm$ 9   |                   |                   | 529 $\pm$ 79        |                 |                   | 787 $\pm$ 125 | 0.21 $\pm$ 0.08   |
| L15 UAE          |                   | 0.46 $\pm$ 0.13 | 18 $\pm$ 2      | 3.3 $\pm$ 0.8 |                   | 39 $\pm$ 13  |                   |                   | 461 $\pm$ 50        |                 |                   | 661 $\pm$ 54  | 0.18 $\pm$ 0.01   |
| L14 VE           | 0.80 $\pm$ 0.25   |                 | 1.1 $\pm$ 0.1   |               |                   |              | 0.014 $\pm$ 0.001 | 0.026 $\pm$ 0.007 | 0.013 $\pm$ 0.001   | 0.32 $\pm$ 0.02 | 0.019 $\pm$ 0.002 |               | 0.064 $\pm$ 0.004 |
| L16 UAE          | 0.87 $\pm$ 0.16   |                 | 1.2 $\pm$ 0.1   |               |                   |              | 0.013 $\pm$ 0.001 | 0.022 $\pm$ 0.001 | 0.012 $\pm$ 0.001   | 0.30 $\pm$ 0.03 | 0.021 $\pm$ 0.001 |               | 0.064 $\pm$ 0.007 |
